# Supplementary material
Source: Springer Nature journal article supplement (https://www.springermedizin.de/resource/supplementary/13000_2011_464_MOESM1_ESM.pdf/9624624)

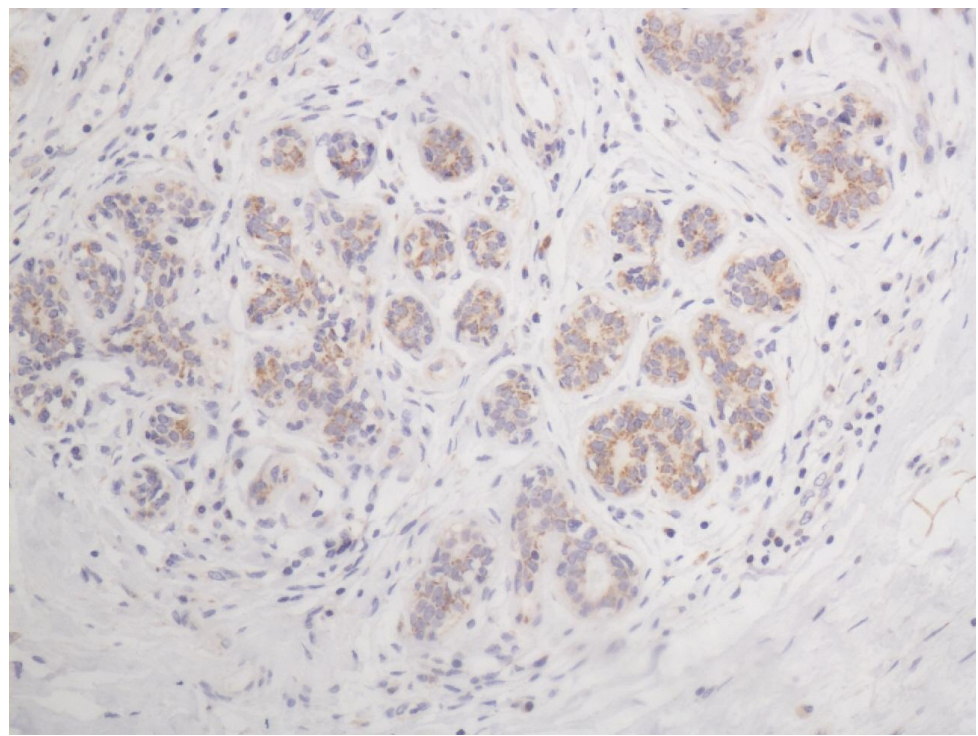

Supplement: MOESM1 [file 9624624]
